# Supplementary material
Source: PubMed Central journal article supplement (PMC2895058)
Supplement: 1000806107_pnas.1000806107_SI.pdf [file 1000806107_pnas.1000806107_SI.pdf]

# Supporting Information

Hye-Ryong Shim et al. 10.1073/pnas.1000806107

## SI Text

**SI Materials and Methods. Cell culture, cloning, and virus generation.** Sf9 insect cells were maintained in suspension in HyQ-SFX media (HyClone) supplemented with 8% (v/v) heat-inactivated FBS. Hi5 insect cells were maintained in HyQ-SFX without serum. N-acetylglucosaminyltransferase I (GnTI)-deficient Human Embryonic Kidney-293 (HEK293 GnTI<sup>-</sup>) cells (1) were maintained in CDM4HEK293 media (HyClone) supplemented with 4% heat-inactivated FBS. For pro-PDGF-A, the cDNA fragment encoding residues 1–183 plus a C-terminal 6-His-tag was subcloned into the pVL1393 vector (Invitrogen). For the PDGF-B/PDGFR $\beta$  complex, the cDNA fragments encoding the ectodomains of human PDGFR $\beta$  (residue 1–314) and human PDGF-B (residue 1–185), attached to a C-terminal seven-histidine tag, were subcloned into the baculovirus mediated mammalian cell gene transduction (BacMam) vector pVLAD6 (2). The constructs and the BacVector-3000 baculovirus DNA (EMD Chemicals) were used to cotransfect sf9 cells in six-well plates in the presence of the InsectGeneJuice transfection reagent (EMD Chemicals). After incubation of the transfected cells at 27 °C for 5 days, the resulting low titer virus stock was harvested, and was used to infect Sf9 cells at  $2 \times 10^6$  cell/mL for amplification.

**Protein expression and purification.** For propeptide-bound PDGF-A, three liters of hi5 cells were grown to a density  $1.8 \times 10^6$  cells/mL and infected with amplified virus at an Multiplicity of Infection (MOI) of 10. After 66 h, the recombinant proteins in the supernatant were captured by the Talon<sup>®</sup> metal affinity resin (Clontech) and eluted with 300 mM imidazole pH7.5. To obtain fully cleaved PDGF-A/propeptide complex, the above supernatant was incubated at room temperature for 3 d before the his-tagged proteins were captured by the Talon resin. For the PDGF-B/PDGFR $\beta$  complex, the amplified PDGF-B and PDGFR $\beta$  BacMam viruses were used to infect 1–6 liters of HEK293 GnTI<sup>-</sup> cells individually at a density of  $1.0$ – $1.5 \times 10^6$  cells/mL. After 72 h, the cells were pelleted, and the supernatants were mixed at appropriate ratio. The complex were captured by the Talon affinity resin and eluted with 300 mM imidazole pH 7.5. The eluted PDGF-B/PDGFR $\beta$  complex was glycan-minimized using Endoglycosidase-F1 (SIGMA) and treated with bovine carboxypeptidase-A (SIGMA) for his-tag removal. All the proteins were further purified with size exclusion columns (Superdex-200, Amersham Biosciences) preequilibrated and eluted with Hepes-buffered saline (HBS) buffer (10 mM Hepes pH7.5, 150 mM NaCl), and concentrated to 10 mg/mL.

## Crystallization.

Crystallization was performed using the sitting-drop vapor diffusion method at 22 °C, with the drops containing equal volumes of protein solution and reservoir solution equilibrated against the reservoir solution. For the PDGF-A/propeptide complex, the

reservoir solution is 1.0 M sodium citrate, 0.1 M imidazole, pH 8.0. For the PDGF-B/PDGFR $\beta$  complex, the reservoir solution is 0.84 M (NH<sub>4</sub>)<sub>2</sub>HPO<sub>4</sub>, 0.1 M imidazole, pH 8.0.

**X-ray diffraction and data processing.** Crystals were cryoprotected in the presence of 30% glycerol in the mother liquor and immediately flash-cooled in liquid nitrogen. X-ray diffraction data were measured at the LS-CAT beamline 21-ID-D, Advanced Photon Source (APS), Argonne, IL. The data were indexed, integrated, and scaled with HKL2000 (3). The PDGF-A/propeptide crystals belonged to the spacegroup P2<sub>1</sub>2<sub>1</sub>2<sub>1</sub>, with cell dimensions  $a = 50.84$  Å,  $b = 119.21$  Å, and  $c = 146.71$  Å. The PDGF-B/PDGFR $\beta$  crystals also belonged to the spacegroup P2<sub>1</sub>2<sub>1</sub>2<sub>1</sub>, with cell dimensions  $a = 78.47$  Å,  $b = 116.82$  Å, and  $c = 134.15$  Å.

**Structure determination and refinement.** To determine the structure of the PDGF-B/PDGFR $\beta$  complex, the PDGF-B dimer and the second immunoglobulin domain (D2) of PDGFR $\beta$  in the complex were located using the molecular replacement program PHASER (4), with the free PDGF-BB structure (PDB ID: 1PDG) and the D2 domain of VEGFR1 (PDB ID: 1FLT) as the search models. After the PDGF-B dimer and PDGFR $\beta$ -D2 were located, PDGFR $\beta$ -D1 was manually placed by superposing KIT-D1-D2 (PDB ID: 2O26) onto PDGFR $\beta$ -D2. The molecular replacement phases were improved with twofold noncrystallographic symmetry (NCS) averaging, as implemented in the program CNS (5), generating *2Fo-Fc* electron density maps in which PDGFR $\beta$ -D3 was clearly discernible. To determine the structure of the PDGF-A/propeptide complex, the PDGF-A dimer in the complex was located using the molecular replacement program PHASER (4), with the free PDGF-BB structure (PDB ID: 1PDG) as the search model. After obtaining the initial phases, the propeptides were manually traced from NCS-averaged electron density maps. The models were rebuilt using COOT (6), and subjected to simulated annealing, minimization, and group B factor refinements with CNS (5). Water molecules were automatically added with CNS and validated with electron density maps.

**Isothermal titration calorimetry.** Calorimetric titrations were carried out on a VP-ITC calorimeter (MicroCal) at 30 °C and the data were processed with MicroCal Origin 5.0 software. Before titrations, all proteins used were buffer-exchanged into an identical lot of HBS buffer (10 mM Hepes pH7.5, 150 mM NaCl) using gel filtration to control buffer heat dilution effects. The protein samples were thoroughly degassed before the experiments. Because PDGFRs can be expressed at higher levels than the ligands, the receptor proteins were chosen as the titrants, and the ligands were placed in the reaction chamber during the experiments.

1. Reeves PJ, Callewaert N, Contreras R, Khorana HG (2002) Structure and function in rhodopsin: high-level expression of rhodopsin with restricted and homogeneous N-glycosylation by a tetracycline-inducible N-acetylglucosaminyltransferase I-negative HEK293S stable mammalian cell line. *Proc Natl Acad Sci USA* 99:13419–13424.
2. Dukkipati A, Park HH, Waghray D, Fischer S, Garcia KC (2008) BacMam system for high-level expression of recombinant soluble and membrane glycoproteins for structural studies. *Protein Expr Purif* 62:160–170.

3. Otwinowski Z, Minor W (1997) Processing of X-ray diffraction data collected in oscillation mode. *Methods Enzymol* 276:307–326.
4. McCoy AJ, et al. (2007) Phaser crystallographic software. *J Appl Cryst* 40:658–674.
5. Brunger AT, et al. (1998) Crystallography & NMR system: A new software suite for macromolecular structure determination. *Acta Crystallogr D* 54:905–921.
6. Emsley P, Cowtan K (2004) COOT: model-building tools for molecular graphics. *Acta Crystallogr D* 60:2126–2132.



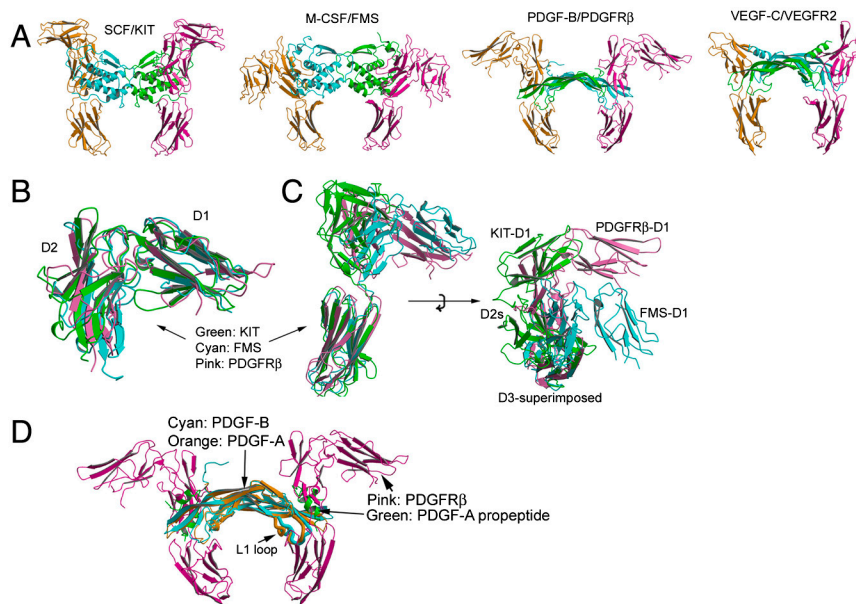

**Fig. 53.** Comparison of the PDGF-B:PDGFR $\beta$  complex with related structures. (A) Side-by-side comparison of the PDGF-B:PDGFR $\beta$ -D1-D3 complex, the SCF/KIT-D1-D3 complex, the M-CSF/FMS-D1-D3 complex, and the VEGF-C/VEGFR2-D2-D3 complex, showing that the D3 positions in these complexes are roughly similar. (B) The D1–D2 modules of KIT and FMS can be superposed to that of PDGFR $\beta$ , with an rms deviation of 2.2 Å between KIT and PDGFR $\beta$  for 104 matching C $\alpha$  atoms, and an rms deviation of 1.9 Å between FMS and PDGFR $\beta$  for 97 matching C $\alpha$  atoms. (C) The difference between KIT, FMS, and PDGFR $\beta$  lies primarily in the orientation of D2, which leads to dramatically different positions of D1, as revealed by the overlaying of their D3 domains. The rms deviation is 2.4 Å between KIT-D3 and PDGFR $\beta$ -D3 for 47 matching C $\alpha$  atoms, and is 2.3 Å between FMS-D3 and PDGFR $\beta$ -D3 for 54 matching C $\alpha$  atoms. (D) Superposition of the PDGF-B:PDGFR $\beta$  complex with the PDGF-A/propeptide complex by overlaying the PDGFs, showing that PDGFR $\beta$  and the propeptide occupy overlapping sites on PDGFs. The superposition of the two complexes also shows that the PDGF-A and PDGF-B L1 loops have similar conformations. The rms deviation is 1.2 Å between PDGF-A and PDGF-B for 172 matching C $\alpha$  atoms.

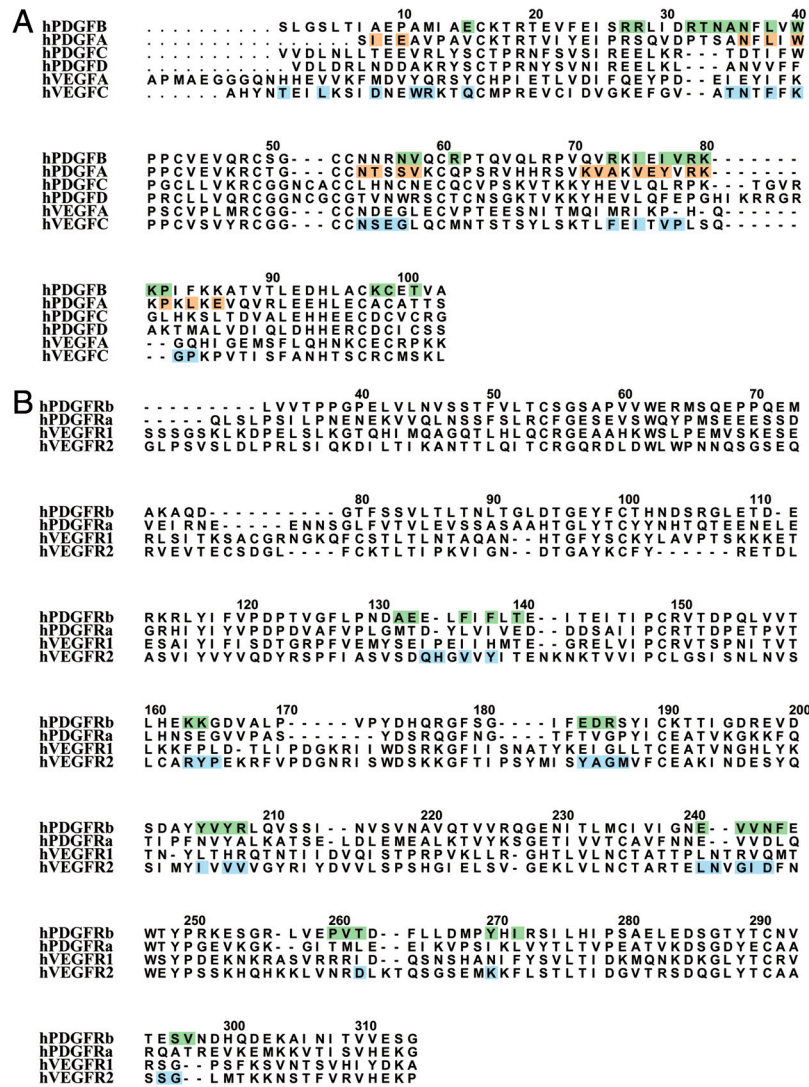

**Fig. S4.** Sequence alignment of PDGFs and PDGFRs, with VEGFs and VEGFRs included for comparison. The interface-contributing residues in the PDGF-B:PDGFR $\beta$  complex are shaded in green. The interface-contributing residues in the VEGF-C:VEGFR2 complex are shaded in cyan. The PDGF-A residues involved in propeptide-binding are shaded in orange.

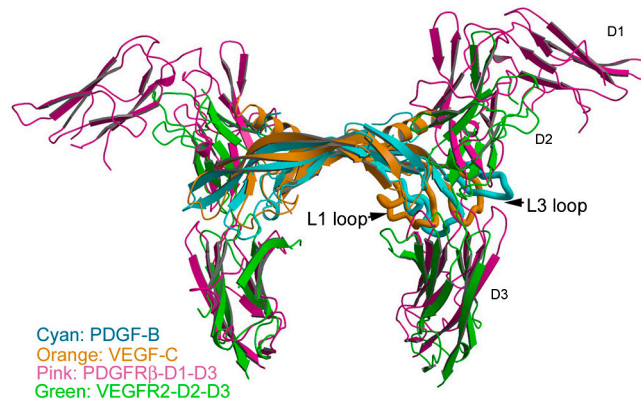

**Fig. S5.** Comparison of the PDGF-B:PDGFR $\beta$ -D1-D3 complex and the VEGF-C:VEGFR2-D2-D3 complex by superposition of the ligands PDGF-B and VEGF-C, showing that the receptor D2 and D3 domains have roughly similar orientations, and the D2 domains are the most different, due to the structural differences between PDGF-B and VEGF-C. The rms deviation is 1.7 Å between VEGF-C and PDGF-B for 132 matching C $\alpha$  atoms. The L1 and L3 loops of PDGF-B and VEGF-C are highlighted as thicker tubes.

**Table S1. Data collection and refinement statistics**

|                                                                    | PDGF-B/PDGFR $\beta$ complex                  | PDGF-A/propeptide complex                     |
|--------------------------------------------------------------------|-----------------------------------------------|-----------------------------------------------|
| <i>Data collection</i>                                             |                                               |                                               |
| Spacegroup                                                         | P2 <sub>1</sub> 2 <sub>1</sub> 2 <sub>1</sub> | P2 <sub>1</sub> 2 <sub>1</sub> 2 <sub>1</sub> |
| Unit cell (a, b, c) (Å)                                            | 78.47, 116.82, 134.15                         | 50.84, 119.21, 146.71                         |
| Wavelength (Å)                                                     | 0.9786                                        | 0.9786                                        |
| Resolution range (Å) (highest resolution shell)                    | 20–2.3 (2.4–2.3)                              | 30–2.4 (2.55–2.4)                             |
| Unique reflections                                                 | 54,767                                        | 45,306                                        |
| Completeness (%)                                                   | 98.8 (97.7)                                   | 98.1 (97.9)                                   |
| <i>I</i> / $\sigma$ ( <i>I</i> )                                   | 14.3 (3.3)                                    | 15.6 (3.5)                                    |
| Redundancy                                                         | 4.0                                           | 5.7                                           |
| <i>R</i> <sub>merge</sub> (%)*                                     | 7.8 (32.7)                                    | 6.8 (37.7)                                    |
| <i>R</i> <sub>meas</sub> (%)*                                      | 6.2 (42.6)                                    | 7.4 (44.6)                                    |
| <i>Refinement</i>                                                  |                                               |                                               |
| Resolution range (Å) (highest resolution shell)                    | 20–2.3 (2.4–2.3)                              | 20–2.4 (2.55–2.4)                             |
| <i>R</i> <sub>cryst</sub> <sup>†</sup>                             | 0.238 (0.342)                                 | 0.225 (0.385)                                 |
| <i>R</i> <sub>free</sub> <sup>†</sup>                              | 0.278 (0.359)                                 | 0.276 (0.389)                                 |
| Average B factor (Å <sup>2</sup> ) (protein, solvent)              | 66.3, 69.3                                    | 65.4, 68.7                                    |
| rmsd bond length (Å)                                               | 0.009                                         | 0.009                                         |
| rmsd bond angle (°)                                                | 1.6                                           | 1.5                                           |
| Ramachandran (favored, allowed, generally allowed, disallowed) (%) | 85.2, 13.4, 1.4, 0                            | 85.9, 12.9, 1.2, 0                            |

\* $R_{\text{merge}} = \sum_{hkl} |I - \langle I \rangle| / \sum_{hkl} I$ , where *I* is the intensity of unique reflection *hkl*, and  $\langle I \rangle$  is the average over symmetry-related observation of unique reflection *hkl*. *R*<sub>meas</sub> is redundancy-independent *R* factor.

<sup>†</sup> $R_{\text{cryst}} = \sum |F_{\text{obs}} - F_{\text{calc}}| / \sum F_{\text{obs}}$ , where *F*<sub>obs</sub> and *F*<sub>calc</sub> are the observed and the calculated structure factors, respectively. *R*<sub>free</sub> is calculated using 5% of reflections sequestered before refinement.

**Table S2. Contacts between the propeptide and PDGF-A**

| The propeptide                |   | The protruding PDGF-A protomer                         | The receding PDGF-A protomer | Distance (Å) |     |
|-------------------------------|---|--------------------------------------------------------|------------------------------|--------------|-----|
| <i>Salt bridges</i>           |   |                                                        |                              |              |     |
| Glu22                         |   | Arg159                                                 |                              | 3.1          |     |
| <i>Hydrogen bonds</i>         |   |                                                        |                              |              |     |
| Leu33                         | O |                                                        | Asn134                       | ND2          | 2.9 |
| Ser36                         | O |                                                        | Asn134                       | ND2          | 2.8 |
| Ile41                         | N |                                                        | Glu90                        | OE1          | 3.2 |
| <i>Van der Waals contacts</i> |   |                                                        |                              |              |     |
| Glu22                         |   | Arg159                                                 |                              |              |     |
| Ala23                         |   | Tyr157, Arg159                                         |                              |              |     |
| Glu24                         |   | Asn116, Tyr157                                         |                              |              |     |
| Ile25                         |   | Asn116, Glu156, Tyr157                                 |                              |              |     |
| Pro26                         |   | Tyr157, Lys160                                         |                              |              |     |
| Val29                         |   | Tyr157                                                 |                              |              |     |
| Ile30                         |   | Leu118                                                 |                              |              |     |
| Ile30                         |   |                                                        | Thr135, Ser137               |              |     |
| Arg32                         |   | Tyr157                                                 |                              |              |     |
| Leu33                         |   | Leu118                                                 |                              |              |     |
| Ala34                         |   |                                                        | Asn134, Thr135               |              |     |
| Ser36                         |   |                                                        | Asn134, Val138               |              |     |
| Gln37                         |   |                                                        | Asn134                       |              |     |
| Ile38                         |   | Trp120                                                 |                              |              |     |
| His39                         |   | Trp120                                                 |                              |              |     |
| Ser40                         |   | Trp120                                                 |                              |              |     |
| Ile41                         |   | Trp120, Lys151, Val152, Ala153, Val155, Leu164, Glu166 |                              |              |     |
| Leu44                         |   | Trp120, Ala153, Leu164, Glu166                         |                              |              |     |
| Leu48                         |   | Tyr157, Pro162                                         |                              |              |     |
| Glu49                         |   | Pro162                                                 |                              |              |     |
| Ile50                         |   | Pro162                                                 |                              |              |     |
| Leu53                         |   | Leu164                                                 |                              |              |     |
| Arg83                         |   | Glu166                                                 |                              |              |     |
| Arg84                         |   |                                                        | Ile88                        |              |     |
| Lys85                         |   |                                                        | Ile88                        |              |     |
| Arg86                         |   |                                                        | Ile88                        |              |     |
